# Supplementary material
Source: PubMed Central journal article supplement (PMC3819941)
Supplement: NIHMS523989-supplement-1_si_001.pdf [file NIHMS523989-supplement-1_si_001.pdf]

**Supporting Information for**  
**Covalent Labeling with Isotopically Encoded Reagents for**  
**Faster Surface Structural Analysis of Proteins by Mass Spectrometry**

Yuping Zhou and Richard W. Vachet\*

Department of Chemistry, University of Massachusetts, Amherst, Massachusetts 01003

Table S1. The TMT<sup>6</sup> concentration and the  $\ln \left[ 1 - 6 \times \frac{I_{\text{modi}}^{\text{total}}}{I_{\text{unmodi}}^{\text{total}} + I_{\text{modi}}^{\text{total}}} \times \frac{i_x}{(i_1 + i_2 + i_3 + i_4 + i_5 + i_6)} \right]$  value for peptide fragment (SRHPAENGKSNF) from  $\beta 2\text{m}$  under PAN fragmentation. This data is used to fit the pseudo-first order reaction. All the experiments were repeated three times, and the means and standard deviations are reported.

| [TMT] mM | $\ln \left[ 1 - 6 \times \frac{I_{\text{modi}}^{\text{total}}}{I_{\text{unmodi}}^{\text{total}} + I_{\text{modi}}^{\text{total}}} \times \frac{i_x}{(i_1 + i_2 + i_3 + i_4 + i_5 + i_6)} \right]$ |
|----------|---------------------------------------------------------------------------------------------------------------------------------------------------------------------------------------------------|
| 0.04     | -0.11 ± 0.06                                                                                                                                                                                      |
| 0.06     | -0.24 ± 0.04                                                                                                                                                                                      |
| 0.08     | -0.40 ± 0.05                                                                                                                                                                                      |
| 0.1      | -0.6 ± 0.1                                                                                                                                                                                        |
| 0.12     | -0.6 ± 0.1                                                                                                                                                                                        |
| 0.16     | -0.7 ± 0.1                                                                                                                                                                                        |

Table S2. The TMT<sup>0</sup> concentration and the  $\ln \frac{I_{\text{unmodi}}}{I_{\text{unmodi}} + I_{\text{modi}}}$  value for peptide fragment (SRHPAENGKSNF) from  $\beta 2\text{m}$ . This data is used to fit the pseudo-first order reaction. All the experiments were repeated three times, and the means and standard deviations are reported.

| [TMT] mM | $\ln \frac{I_{\text{unmodi}}}{I_{\text{unmodi}} + I_{\text{modi}}}$ |
|----------|---------------------------------------------------------------------|
| 0.04     | -0.4 ± 0.1                                                          |
| 0.06     | -0.49 ± 0.04                                                        |
| 0.08     | -0.7 ± 0.1                                                          |
| 0.1      | -0.8 ± 0.1                                                          |
| 0.12     | -0.77 ± 0.08                                                        |
| 0.16     | -1.1 ± 0.2                                                          |

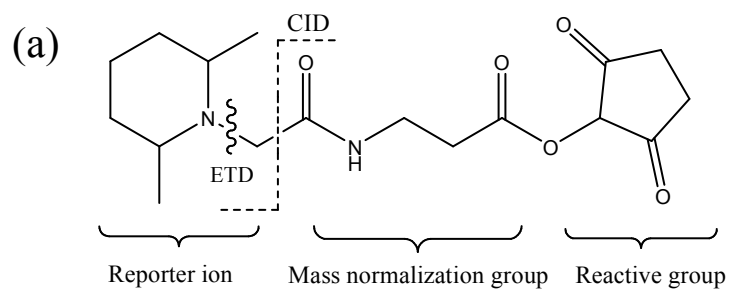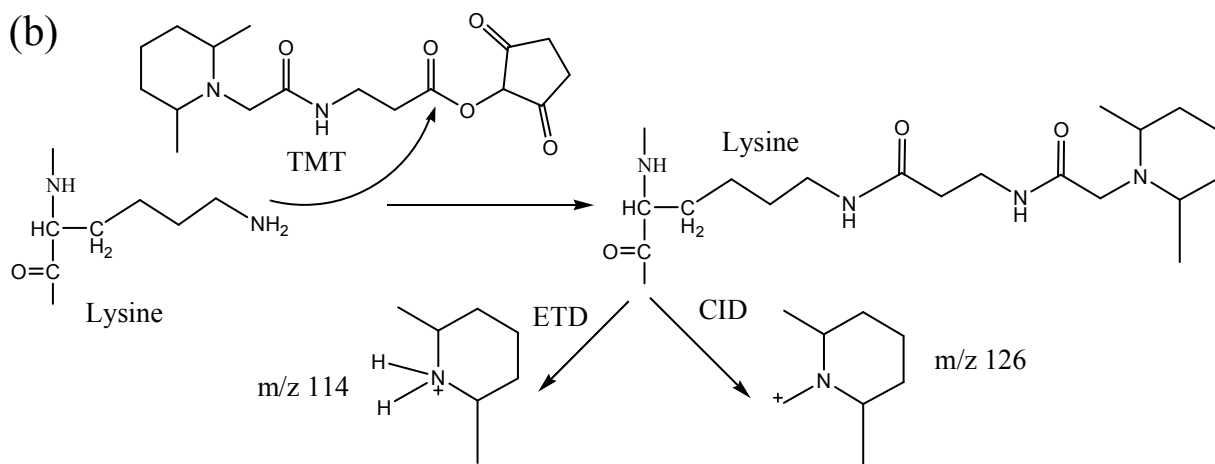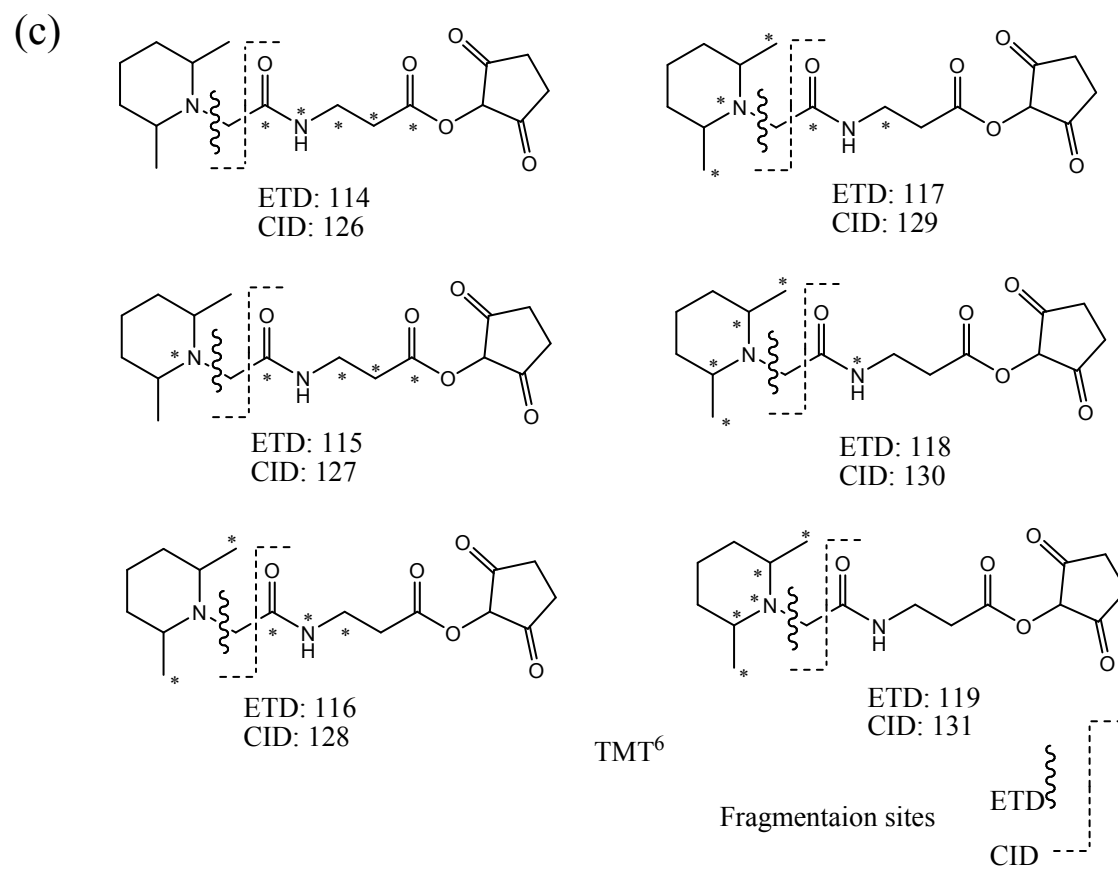

Scheme S1. (a) General structure of the TMT reagents. (b) Reaction of TMT with lysine and the reporter ions that result after MS/MS, by ETD or CID. (c) Structure, isotope position, MS/MS fragmentation sites and CID/ETD reporter ions for TMT<sup>6</sup>.

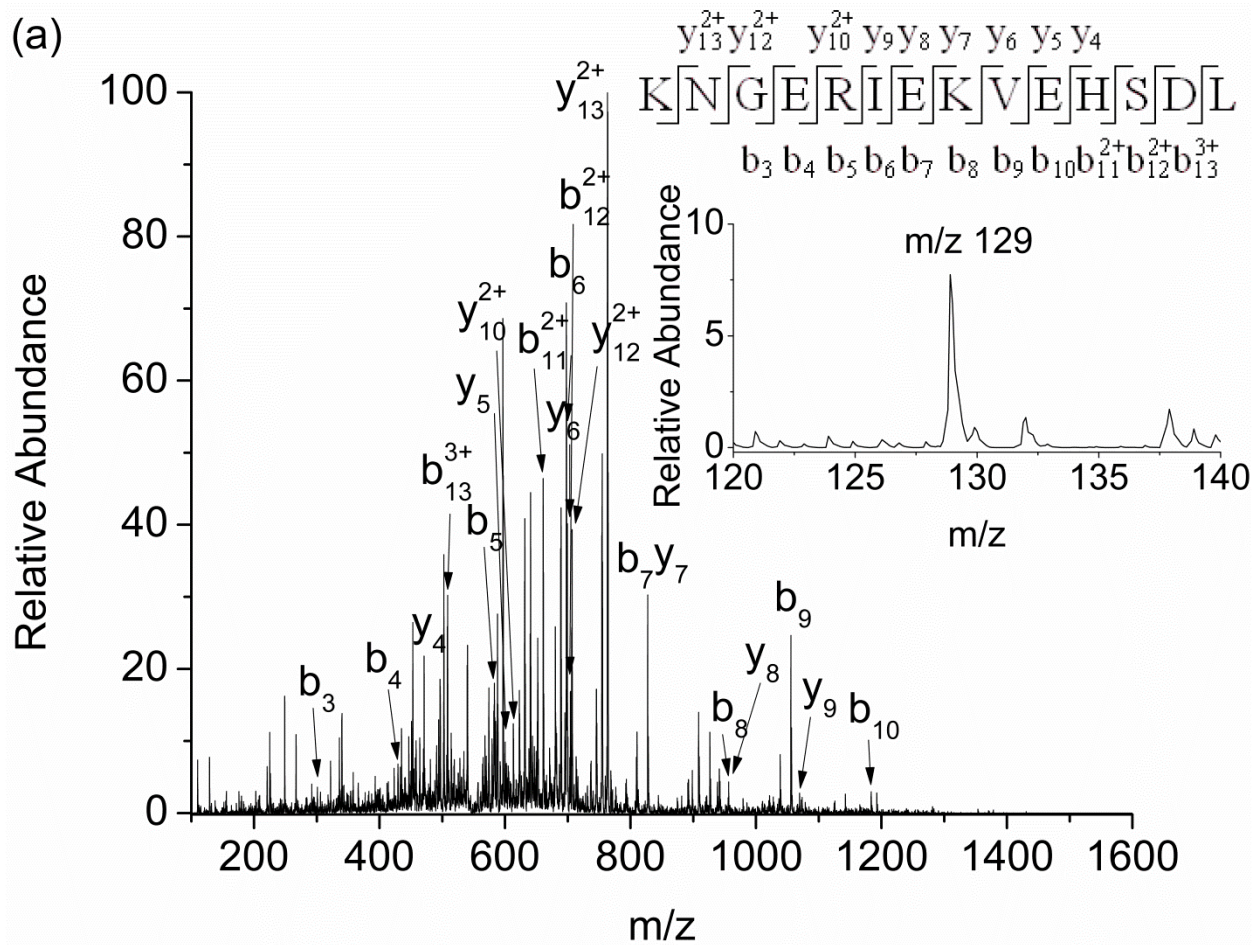

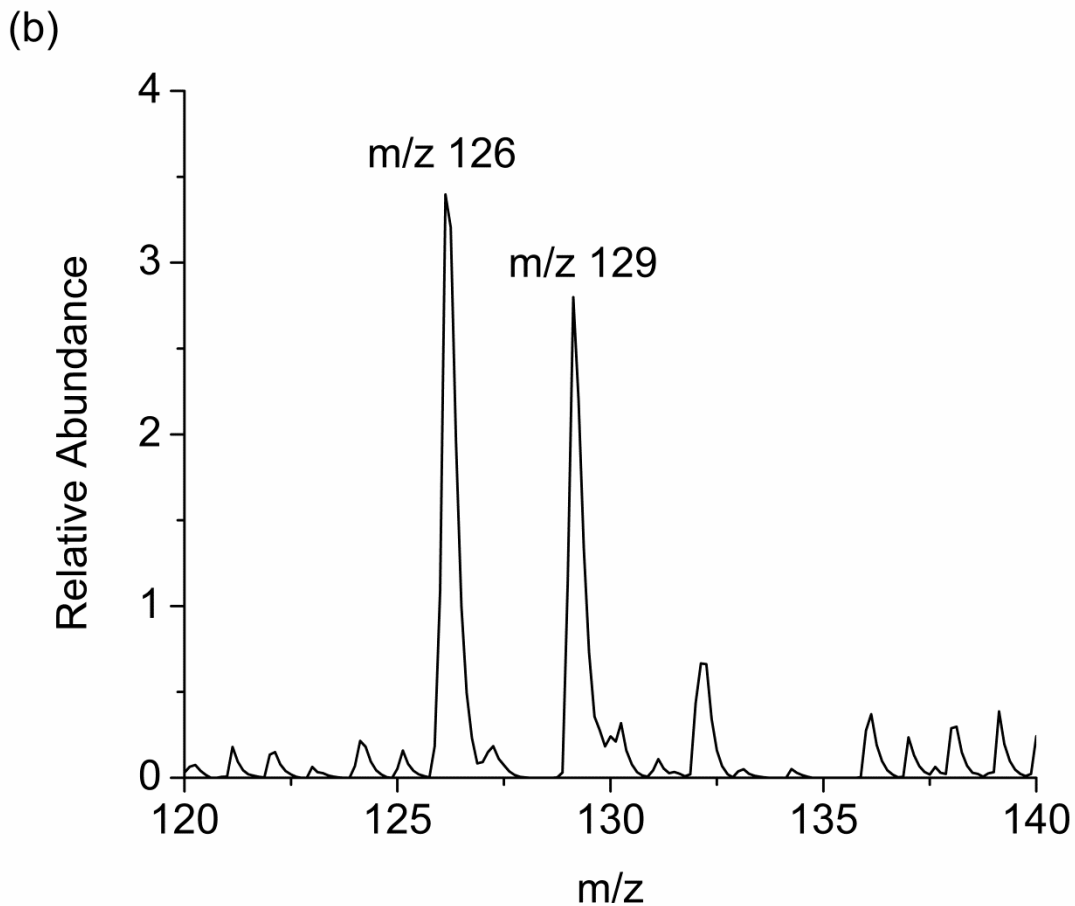

**Figure S1:** (a) CID tandem mass spectrum of the  $[M+4H]^{4+}$  ion of the peptide fragment KNGERIEKVEHSDL from  $\beta 2m$ , acquired using the PAN mode (see experimental section for details). A series of b and y ions confirmed the sequence of the peptide fragment. (b) CID mass spectrum of the  $[M+4H+TMT^0]^{4+}$  ion of the peptide fragment KNGERIEKVEHSDL in the m/z range around the reporter ions. This spectrum was acquired using the PAN mode.
